# Supplementary material
Source: HighWire-hosted journal article supplement (https://bjo.bmj.com/content/102/12/1621)
Supplement: inline-supplementary-material-1 [file inline-supplementary-material-1.pdf]

## Supplementary Table 1

Control contact lens users: diagnoses for the 213 Controls

| Diagnosis                                                                         | Frequency |
|-----------------------------------------------------------------------------------|-----------|
| <b>Diseases classified as unrelated to contact lens wear: listed by frequency</b> |           |
| Viral conjunctivitis                                                              | 17        |
| Dry eyes                                                                          | 10        |
| Chalazion                                                                         | 5         |
| Posterior vitreous detachment                                                     | 4         |
| Sub-tarsal foreign body                                                           | 4         |
| Conjunctivitis                                                                    | 3         |
| Allergic conjunctivitis                                                           | 3         |
| Blepharitis & dry eye                                                             | 3         |
| Marginal keratitis & bilateral blepharitis                                        | 3         |
| Conjunctival abrasion (non-lens related)                                          | 2         |
| Ocular migraine                                                                   | 2         |
| Recurrent corneal erosion syndrome                                                | 2         |
| Chalazion & bilateral blepharitis                                                 | 3         |
| Corneal foreign body                                                              | 2         |
| Blepharitis                                                                       | 2         |
| Blepharitis & dry eyes                                                            | 2         |
| Inflamed chalazion                                                                | 1         |
| Corneal scar                                                                      | 1         |
| Acute anterior uveitis and right chalazion                                        | 1         |
| Acute anterior uveitis                                                            | 1         |
| Meibomian gland dysfunction & dry eyes                                            | 1         |
| Corneal foreign body & conjunctival abrasion                                      | 1         |
| Lattice degeneration                                                              | 1         |
| Sub-tarsal foreign body and corneal abrasion                                      | 1         |
| Ametropia                                                                         | 1         |
| Nothing found (given lid hygiene and/or lubricants)                               | 2         |
| Allergic reaction (lids)                                                          | 1         |
| Blunt trauma                                                                      | 1         |
| Conjunctival retention cyst                                                       | 1         |
| Eczematous lids                                                                   | 1         |
| Ocular hypertension                                                               | 1         |
| Nothing found (possibly a systemic viral illness)                                 | 1         |
| Allergic reaction (lids) & dry eye                                                | 1         |
| In-growing eyelash                                                                | 1         |
| Episcleritis                                                                      | 1         |
| Blepharitis and right acute hordeoleum                                            | 1         |
| Limbitis                                                                          | 1         |
| Dry eyes following viral conjunctivitis                                           | 1         |
| Chalazia                                                                          | 1         |
| Vitreous floaters                                                                 | 1         |
| Blepharo-conjunctivitis                                                           | 1         |
| Marginal keratitis                                                                | 1         |
| Optic neuritis                                                                    | 1         |
| Marginal keratitis & bilateral dry eyes                                           | 1         |
| Retrolbulbar optic neuritis                                                       | 1         |
| Optic disc drusen                                                                 | 1         |
| Preseptal cellulitis and bilateral blepharitis                                    | 1         |
| Preseptal cellulitis and chalazion                                                | 1         |

| <b>Diseases classified as unrelated to contact lens wear: listed by frequency continued</b> |            |
|---------------------------------------------------------------------------------------------|------------|
| Diagnosis                                                                                   | Frequency  |
| Marginal keratitis and blepharitis                                                          | 1          |
| Scleritis                                                                                   | 1          |
| Chemical keratitis                                                                          | 1          |
| Nothing found                                                                               | 1          |
| <b>Total unrelated to Contact Lens wear</b>                                                 | <b>104</b> |

| <b>Diseases classified as Contact Lens (CL) related: listed by frequency</b> |            |
|------------------------------------------------------------------------------|------------|
| Corneal infiltrative event (CIE)                                             | 44         |
| CL overwear                                                                  | 23         |
| CL associated - microbial keratitis (MK) - moderate                          | 11         |
| CL associated - microbial keratitis - mild                                   | 8          |
| CL associated - uncertain whether a CIE or MK                                | 1          |
| Corneal abrasion (1 in mild keratoconus patient)                             | 8          |
| Toxic (chemical keratitis)                                                   | 2          |
| CL related punctate corneal erosions (possibly fit related)                  | 1          |
| CL overwear & R conjunctival abrasion                                        | 1          |
| CL overwear & dry eyes                                                       | 1          |
| CL overwear & corneal abrasion                                               | 1          |
| Conjunctival abrasion: CL related                                            | 1          |
| Scatched CL's & CL related dry eyes                                          | 1          |
| CL related punctate epitheliopathy                                           | 1          |
| CL related corneal epitheliopathy                                            | 1          |
| Epithelial oedema: probably secondary to a tight CL                          | 1          |
| Epitheliopathy: probably CL solution related                                 | 1          |
| Retained CL with associated punctate corneal erosions                        | 1          |
| CL associated conjunctival hyperaemia                                        | 1          |
| <b>Total CL-Related</b>                                                      | <b>109</b> |

**Supplementary Table 2**

Contact lens (CL) solution information table (listed alphabetically by manufacturer (where known) and product name)

| SOFT CL DISINFECTION SOLUTIONS                                                                        |                                                        |                                                                                                                          |                                                                                                                                                                                                                                                                                               |                         |                                  | Verified                |                    |
|-------------------------------------------------------------------------------------------------------|--------------------------------------------------------|--------------------------------------------------------------------------------------------------------------------------|-----------------------------------------------------------------------------------------------------------------------------------------------------------------------------------------------------------------------------------------------------------------------------------------------|-------------------------|----------------------------------|-------------------------|--------------------|
| Unless stated data from ACLM handbooks, internet, solution packaging (Boots and Mesmeryez) and online |                                                        |                                                                                                                          |                                                                                                                                                                                                                                                                                               |                         |                                  | Availability at 01_2011 | Formulation source |
| Manufacturers name                                                                                    | Rebranded name                                         | Active disinfectant(s)                                                                                                   | Excipients (non-disinfectant ingredients)                                                                                                                                                                                                                                                     | Availability at 01_2011 | Formulation source               | Verified                |                    |
| AMO <sup>®</sup> Oxysept 1 step                                                                       | Not applicable (NA)                                    | Hydrogen peroxide 3%                                                                                                     | Neutralized with enzyme neutralizing tablet containing catalase, hydroxypropyl methylcellulose, and cyanocobalamin (vitamin B12) as color indicator, with buffering and tableting agents. Solution also contains sodium stannate, sodium nitrate, buffered with phosphates and purified water | Yes                     | Website                          | Y                       |                    |
| AMO Complete RevitaLens                                                                               | NA                                                     | Polyquaternium-1 0.0003%,<br>Alexidine dihydrochloride 0.00016%                                                          | EDTA, Tetriconic 904, boric acid/borate [1]                                                                                                                                                                                                                                                   | Yes                     | Kilvington, 2010                 | Y                       |                    |
| Alcon OPTI-FREE EXPRESS                                                                               | NA                                                     | polyquaternium-1 (POLYQUAD <sup>®</sup> ) 0.001% and myristamidopropyl dimethylamine (ALDOX <sup>®</sup> ) 0.0005%       | Sodium citrate, sodium chloride, boric acid, sorbitol, aminomethylpropanol, TETRONIC <sup>®</sup> 1304 <sup>d</sup> , with edetate disodium 0.05%                                                                                                                                             | Yes                     | Package insert                   | Y                       |                    |
| Alcon OPTI-FREE PureMoist                                                                             | NA                                                     | polyquaternium-1 (POLYQUAD <sup>®</sup> ) 0.001% and myristamidopropyl dimethylamine (ALDOX <sup>®</sup> ) 0.0006%       | Sodium citrate, sodium chloride, boric acid, sorbitol, aminomethylpropanol, disodium EDTA, two wetting agents (TETRONIC <sup>®</sup> 1304 <sup>d</sup> and HydraGlyde <sup>®</sup> Moisture Matrix [EOBO-41 <sup>®</sup> polyoxyethylene polyoxybutylene])                                    | No from June 2011       | Package insert                   | Y                       |                    |
| Alcon OPTI-FREE RepleniSH                                                                             | NA                                                     | polyquaternium-1 (POLYQUAD <sup>®</sup> ) 0.001% and myristamidopropyl dimethylamine (ALDOX <sup>®</sup> ) 0.0005%       | Sodium citrate, sodium chloride, sodium borate, propylene glycol, TEARGLYDE <sup>®</sup> proprietary dual action reconditioning system (TETRONIC <sup>®</sup> 1304 <sup>d</sup> , nonanoyl ethylenediaminetriacetic acid)                                                                     | Yes                     | Package insert                   | Y                       |                    |
| ASDA All in One contact lens solution                                                                 | Uncertain whether this is own manufacture or rebranded | Polyhexanide (PHMB) (concentration unstated on packaging)                                                                | Poloxamer, HPMC, sodium hyaluronate, sodium phosphate                                                                                                                                                                                                                                         | Uncertain               | Phone interview with store staff | Y                       |                    |
| B&L <sup>a</sup> Biotrue                                                                              | NA                                                     | Polyaminopropyl biguanide (PAPB) 0.00013% & polyquaternium 0.0001%. PAPB and PHMB are interchangeable terms <sup>e</sup> | Hyaluronan, sulfobetaine, poloxamine, boric acid, sodium borate, edetate disodium & sodium chloride                                                                                                                                                                                           | Yes                     | Package insert                   | Y                       |                    |
| B&L EasySept                                                                                          | NA                                                     | Hydrogen peroxide 3% with catalytic disc                                                                                 | Phosphonic acid, phosphate buffers & sodium chloride                                                                                                                                                                                                                                          | Yes                     | Package insert                   | Y                       |                    |
| B&L Renu MPS for sensitive eyes                                                                       | NA                                                     | Polyaminopropyl biguanide (PAPB, DYMED <sup>®</sup> ) 0.00005%                                                           | Boric acid, edetate disodium, poloxamine, sodium borate & sodium chloride                                                                                                                                                                                                                     | Yes                     | Package insert                   | Y                       |                    |

|                                             |                                                                                                                                    |                                                                                                   |                                                                                                                                           |                                                     |                                  |   |
|---------------------------------------------|------------------------------------------------------------------------------------------------------------------------------------|---------------------------------------------------------------------------------------------------|-------------------------------------------------------------------------------------------------------------------------------------------|-----------------------------------------------------|----------------------------------|---|
| B&L ReNu Multiplus                          | B&L ReNu Fresh                                                                                                                     | Polyaminopropyl biguanide (PAPB, DYMED®) 0.0001%                                                  | Hydroxyalkylphosphonate (HYDRANATE®), boric acid, edetate disodium, poloxamine, sodium borate & sodium chloride                           | Yes                                                 | Package insert                   | Y |
| Boots CL solution                           |                                                                                                                                    | Polyaminopropyl biguanide (PAPB) 0.0001%<br>PAPB and PHMB are interchangeable terms <sup>c</sup>  | Hydroxyalkylphosphonate 0.03%, poloxamine 1%, boric acid, disodium edetate, sodium borate & sodium chloride                               | Same formulation as B&L ReNu Multiplus/Fresh        | Package insert                   | Y |
| Boots All In One                            |                                                                                                                                    | Polyaminopropyl biguanide (PAPB) 0.00005%<br>PAPB and PHMB are interchangeable terms <sup>c</sup> | Poloxamine 1%, boric acid, disodium edetate, sodium borate & sodium chloride                                                              | Same formulation as B&L ReNu MPS for sensitive eyes | Package insert                   | Y |
| Ciba Vision AOSepT Plus                     | NA                                                                                                                                 | Hydrogen peroxide 3% with catalytic disc                                                          | Phosphonic acid, phosphate buffers, poloxamer & sodium chloride                                                                           | Yes                                                 | Package insert                   | Y |
| Ciba Vision Solocare Aqua <sup>e</sup>      | Menicon Solocare Aqua                                                                                                              | PHMB 0.0001%                                                                                      | Dexapanthanol (provitamin B5), Tromethamine, Sodium dihydrogen phosphate, Poloxamer 407, Ethylenediaminetetraacetic acid (EDTA), Sorbitol | Yes                                                 | Product brochure                 | Y |
| CooperVision Options Multi                  | NA                                                                                                                                 | PHMB 0.0001%                                                                                      | Borate buffers                                                                                                                            | Yes                                                 | ACLM Handbook                    | Y |
| CooperVision/Sauflon ComfortVue             | Procis Premium All in One (Optic Actuell, Germany).                                                                                | PHMB 0.0001%                                                                                      | Poloxamer, phosphate buffer, hydroxypropyl methylcellulose                                                                                | Uncertain                                           | ACLM Handbook                    | Y |
| CooperVision Sauflon Synergi                | easyvision all purpose (Specsavers, UK) AND Irista Silicone Hydrogel multipurpose solution (France marketed by Generale d'Optique) | Oxipol, Oxychlorite complex (sodium chlorite and hydrogen peroxide)                               | Phosphate, poloxamer, Hydroxypropyl methylcellulose (HPMC), Polyvinylpyrrolidone (PVP) [2]                                                | Yes                                                 | Garcia-Porta, 2015               | Y |
| CooperVision Sauflon Multi                  | easyvision peroxide (Specsavers, UK)                                                                                               | Hydrogen peroxide 3% with platinum catalytic disc                                                 |                                                                                                                                           | Yes                                                 | ACLM Handbook                    | Y |
| CooperVision Sauflon All in One Light       | easyvision multipurpose (Specsavers, UK)                                                                                           | PHMB 0.0001%                                                                                      | Phosphate, Poloxamer, Disodium edetate [3]                                                                                                | Yes                                                 | Beattie, 2003                    | Y |
| CooperVision CyClean                        |                                                                                                                                    | PAPB 0.0013 and Polyquaternium 0.001%                                                             | Hylauronan, Sulfobetaine (detergent that may have antimicrobial effects), boroc acid, sodium borate, EDTA, sodium chloride                | Uncertain                                           | Phone interview with store staff | Y |
| Menicon MeniCare Soft multipurpose solution | NA                                                                                                                                 | PHMB 0.0001%                                                                                      | Phosphate, Poloxamer, HPMC (Biopol), EDTA                                                                                                 | Yes                                                 | Manufacturer                     | N |
| MesmerEyez multipurpose soft lens solution  | Unknown no response from UK distributor                                                                                            | PHMB (concentration not on bottle or website) No response                                         | Macroglycerol, hydroxystearate 60, EDTA, propylene glycol, tonicity agents (2)                                                            | Yes                                                 | Kilvington, 2010                 | Y |
|                                             |                                                                                                                                    |                                                                                                   | EDTA, Poloxamer, Boric acid, Sodium borate, sodium chloride, hydroxypropylmethylcellulose                                                 | Yes                                                 | Bottle label                     | Y |

|                                                              |                                                            |                                                  |                                                                                                                                                                   |                     |                                  |   |
|--------------------------------------------------------------|------------------------------------------------------------|--------------------------------------------------|-------------------------------------------------------------------------------------------------------------------------------------------------------------------|---------------------|----------------------------------|---|
| Morrison's All in One contact lens solution                  | Not clear whether this is own brand or rebranded           | to email to company on 30.1.16                   | Sodium and potassium chloride, EDTA, poloxamer, HPMC, sodium hyaluronate, sodium phosphate                                                                        | Uncertain           | From website                     | Y |
| Optical Express Ciel All in One contact lens solution        | Own manufacture                                            | Polyhexanide (PHMB) concentration not stated     | The active ingredient is the only one listed on the packaging                                                                                                     | Uncertain           | Phone Interview with store staff |   |
| Sainsbury's all in one contact lens solution                 | Proprietary to Sainsbury's (East Midlands Pharmaceuticals) | Polyhexanide (PHMB) 0.0001%                      | Disodium Edetate, Hypromellose, Poloxamer, Sodium & Potassium Chloride                                                                                            | No from August 2012 | Product brochure                 | Y |
| Tesco all in one contact lens solution                       | Proprietary to Tesco's (East Midlands Pharmaceuticals)     | PHMB 0.00015%                                    | Disodium Edetate, Sodium Hyaluronate, Hypromellose, Poloxamer, Sodium & Potassium Chloride                                                                        | Yes                 | Product brochure                 | Y |
| <b>SOFT CL CLEANING SOLUTIONS</b>                            |                                                            |                                                  |                                                                                                                                                                   |                     |                                  |   |
| EYEE crystal cleaning solution now rebranded as Oté Clean 40 | Oté Pharma Sol BV Netherlands 5406                         | PHMB 0.002% as preservative                      | Non-ionic cleaning ingredients                                                                                                                                    | Yes                 | From bottle                      | Y |
| <b>RIGID CL DISINFECTION SOLUTIONS</b>                       |                                                            |                                                  |                                                                                                                                                                   |                     |                                  |   |
| AMO Total Care disinfecting, storing and wetting solution    | NA                                                         | PHMB 0.0001%                                     | Purified water, tromethamine, sodium chloride, hydroxypropylmethylcellulose, EDTA and tyloxapol                                                                   | Yes                 | Website                          | Y |
| B&L Boston Advance                                           | NA                                                         | chlorhexidine gluconate (0.003%), PAMB (0.0005%) | Cationic cellulose derivative polymer, a cellulosic viscosifier, polyvinyl alcohol and a derivatized polyethylene glycol, edetate disodium (0.05%).               | Yes                 | Package insert                   | Y |
| B&L Boston Simplus                                           | NA                                                         | chlorhexidine gluconate (0.003%), PAMB (0.0005%) | Poloxamine, hydroxyalkylphosphonate, boric acid, sodium borate, sodium chloride, hydroxypropylmethyl cellulose, Glucam                                            | Yes                 | Package insert                   | Y |
| <b>RIGID LENS CLEANERS</b>                                   |                                                            |                                                  |                                                                                                                                                                   |                     |                                  |   |
| B&L Boston Cleaner                                           | NA                                                         | PHMB 0.0005% Chlorhexidine 0.003%                | Alkyl ether sulfate (9.8% w/v), ethoxylated alkyl phenol, sodium chloride, silica suspension, sodium phosphate dibasic and triquaternary cocoa base phospholipids | Yes                 | Bottle                           | Y |
| EYEE crystal cleaning solution now rebranded as Oté Clean 40 | Oté Pharma Sol BV Netherlands 5406                         | PHMB 0.002% as preservative                      | Non-ionic cleaning ingredients                                                                                                                                    | Yes                 | Bottle                           | N |

<sup>a</sup>Abbot Medical Optics

<sup>b</sup>Bausch & Lomb

<sup>c</sup>PAPB and PHMB are interchangeable terms: the term quoted is the one given on the packaging.

<sup>d</sup>TETRONIC® is a registered trademark of BASF.

<sup>e</sup>System contains antibacterial contact lens case

- 1 Kilvington S, Huang L, Kao E, Powell CH. Development of a new contact lens multipurpose solution: comparative analysis of microbiological, biological and clinical performance. *Journal of Optometry* 2010; 3(3):134-142
2. Garcia-Porta N, Rico-del-Viejo L, Ferreira-Neves H, Peixoto-de-Matos SC, Queiros A, Gonzalez-Mejome JM: Performance of three multipurpose disinfecting solutions with a silicone hydrogel contact lens. *BioMed research international* 2015, 2015:216932.
3. Beattie TK, Seal DV, Tomlinson A, McFayden AK, Grimason AM: Amoebicidal activity of multipurpose contact lens solutions using a most probable number (MPN) enumeration technique. *J Clin Microbiol* 2003, 41:2992-3000.

**Supplementary Table 3**

**Contact lens types**

| <b>CL Brand/Name = alternative name</b>                                                                   | <b>Water content</b> | <b>Oxygen permeability</b> | <b>Material name</b> | <b>Material Group</b> |
|-----------------------------------------------------------------------------------------------------------|----------------------|----------------------------|----------------------|-----------------------|
| ACUVUE 2 colours (Johnson & Johnson)                                                                      | 58                   | 21                         | Etafilcon A          | IV                    |
| ACUVUE 2/ BIFOCAL (Johnson & Johnson)                                                                     | 58                   | 21                         | Etafilcon A          | IV                    |
| ACUVUE ADVANCE / ASTIGMATISM (Johnson & Johnson)                                                          | 47                   | 60                         | Galyfilcon A         | VA                    |
| ACUVUE OASYS/ASTIGMATISM/ PRESBYOPIA (Johnson & Johnson)                                                  | 38                   | 107.4                      | Senofilcon A         | VA                    |
| AIR OPTIX AQUA/ ASTIGMATISM/ MULTIFOCAL (CIBA Vision)                                                     | 33                   | 110                        | Lotrafilcon B        | VC                    |
| AIR OPTIX Night and Day (CIBA Vision)                                                                     | 24                   | 140                        | Lotrafilcon A        | VC                    |
| Avaira (CooperVision)                                                                                     | 46                   | 100                        | Enfilcon A           | VC                    |
| Biofinity /Toric/ Multifocal (CooperVision)                                                               | 48                   | 128                        | Comfilcon A          | VC                    |
| Biomedics 55 Evolution/ Toric (CooperVision)                                                              | 55                   | 19                         | ocufilcon D          | IV                    |
| Boots Night and Day (Boots)                                                                               | 24                   | 140                        | Lotrafilcon A        | VC                    |
| Boots Monthly (Boots) = Premium-(Lotrafilcon B)                                                           | 33                   | 110                        | Lotrafilcon B        | VC                    |
| easyvision Monthly Classic/Aspheric/Toric/XR (Specsavers) = Coopervision Frequency 55                     | 55                   | 19                         | Methafilcon A        | II                    |
| easyvision Irisian /Toric/Multifocal (Specsavers) = Air Optix for Astigmatism Monthly Toric (Ciba Vision) | 33                   | 110                        | lotrafilcon B        | VC                    |
| Easy Vision Irisian Sphere = Air Optix Aqua, monthly (Ciba Vision)                                        | 33                   | 110                        | lotrafilcon B        | VC                    |
| easyvision Opteyes/Toric (Specsavers) = Biofinity Toric Monthly Toric (CooperVision)                      | 48                   | 128                        | Comfilcon A          | VC                    |
| easyvision Aquaeyes (Specsavers) = AirOptix Night and Day Aqua                                            | 24                   | 140                        | Lotrafilcon A        | VC                    |
| EASYVISION UVICIA (silicone hydrogel) = Avaira                                                            | 46                   | 100                        | Enfilcon A           | VC                    |
| EASYVISION LACRIMA PLUS (silicon hydrogel) = clariti elite                                                | 56                   | 60                         | somofilcon A         | VB                    |
| Expressions Colors (CooperVision)                                                                         | 55                   | 19                         | Methafilcon A        | IV                    |
| Frequency 55 / Xcel Toric (CooperVision)                                                                  | 55                   | 19                         | Methafilcon A        | IV                    |
| FreshLook Colorblends / Colors / Dimensions (CIBA Vision)                                                 | 55                   | 16                         | Phemfilcon A         | IV                    |
| Proclear/ Toric/ EP (CooperVision)                                                                        | 62                   | 27                         | omafilcon B          | II                    |
| PureVision/ Toric/Multi-focal (Bausch & Lomb)                                                             | 36                   | 91                         | Bala filcon A        | III                   |
| PureVision 2 HD/ 2 HD for Astigmatism (Bausch & Lomb)                                                     | 36                   | 91                         | Bala filcon A        | VA                    |
| SofLens 38 (Bausch & Lomb)                                                                                | 38                   | 6                          | Polymacon            | I                     |
| SofLens 59 (Bausch & Lomb)                                                                                | 59                   | 17                         | Hilafilcon b         | II                    |
| SofLens Toric /Multifocal (Bausch & Lomb)                                                                 | 66                   | 24                         | Alphafilcon a        | II                    |
| CRYSTAL (Ocuflcon D 45%)                                                                                  | 45                   | 19.6                       | ocufilcon D          | III                   |
| GEO COLOUR (from Korea) = 'Circle' SCLs (large diameter)                                                  | 42                   | 9                          | polymacon            | I                     |
| CLARITI ELITE (silicon hydrogel)                                                                          | 56                   | 60                         | somofilcon A         | VB                    |
| DESIO (Desiolens.com). Coloured, 62% polymacon, 38%WC                                                     | 38                   | 9                          | poylmacon            | I                     |
| SEQUENCE 55                                                                                               | 38                   | 9                          | polymacon            | I                     |
| Sauflon clariti                                                                                           | 56                   | 60                         | Somofilcon A         | VB                    |
| Ascend Premier = Biofinity                                                                                | 48                   | 128                        | Comfilcon A          | VC                    |
| IWear XRT Supreme = Biofinity Toric ( available in LATAM)                                                 | 48                   | 128                        | Comfilcon A          | VC                    |
| Irisia care (monthly)                                                                                     | 33                   | 110                        | Uncertain            | VC                    |

**Lens material classification**

- Group I: (low water (< 50%), non-ionic)
- Group II: (high water (>= 50%), nonionic)
- Group III: (low water, (< 50%), ionic)
- Group IV: (high water, (>= 50%), ionic)
- Group V: Materials with Dk > 40 Dk units (in mmHg) and greater than expected on the basis of water content
- Group VA: Group 5 materials containing an ionic monomer or oligomer at pH 6-8
- Group VB: Group 5 non-ionic material containing > 50% water
- Group VC: Group 5 non-ionic material containing < 50% water

**Supplementary Table 4**

Potential risk factors for AK, initially selected for inclusion in the model building process. Results from logistic models without adjustment for confounding.

|                                                                                                    |         |      |       | Odds               |                   | 95% CI for |       |
|----------------------------------------------------------------------------------------------------|---------|------|-------|--------------------|-------------------|------------|-------|
| Variable                                                                                           | Control | Case | Total | Ratio <sup>1</sup> | p-value           | Odds Ratio |       |
| <b>Disinfectant classified by Principal Active Ingredient (PAI)</b>                                |         |      |       |                    |                   |            |       |
| 1: PHMB (0.00005-0.0001)                                                                           | 90      | 11   | 101   | <i>Referent</i>    |                   |            |       |
| 2: Polyquad-1(0.001%)+ALDOX (0.0005%) <sup>2</sup>                                                 | 26      | 9    | 35    | 2.83               | <b>0.038</b>      | 1.06       | 7.57  |
| 3: Peroxide3%                                                                                      | 12      | 5    | 17    | 3.41               | <b>0.048</b>      | 1.01       | 11.51 |
| 4: Polyquad 1(0.0001%)+Polyaminopropyl biguanide                                                   | 11      | 2    | 13    | 1.49               | 0.633             | 0.29       | 7.60  |
| 5: Oxipol                                                                                          | 55      | 29   | 84    | 4.31               | <b>&lt; 0.001</b> | 2.00       | 9.33  |
| 6: Rigid Gas permeable lens solutions                                                              | 11      | 5    | 16    | 3.72               | <b>0.036</b>      | 1.09       | 12.71 |
| Unknown                                                                                            | 8       | 2    | 10    |                    |                   |            |       |
| <b>Total</b>                                                                                       | 213     | 63   | 276   |                    |                   |            |       |
| <b>Frequency of contact lens CL wear: days per week</b>                                            |         |      |       |                    |                   |            |       |
| Up to 4 days                                                                                       | 34      | 4    | 38    | <i>Referent</i>    |                   |            |       |
| > 4 days                                                                                           | 179     | 57   | 236   | 2.71               | 0.070             | 0.92       | 7.95  |
| Unknown                                                                                            | 0       | 2    | 2     |                    |                   |            |       |
| <b>Total</b>                                                                                       | 213     | 63   | 276   |                    |                   |            |       |
| <b>CL materials classification:</b><br>based on FDA/ANSI standards listed in Supplementary Table 3 |         |      |       |                    |                   |            |       |
| Group I                                                                                            | 3       | 0    | 3     | (empty)            |                   |            |       |
| Group II                                                                                           | 13      | 6    | 19    | 2.70               | 0.086             | 0.87       | 8.37  |
| Group III                                                                                          | 2       | 0    | 2     | (empty)            |                   |            |       |
| Group IV                                                                                           | 13      | 7    | 20    | 3.15               | <b>0.039</b>      | 1.06       | 9.37  |
| Group VA                                                                                           | 76      | 13   | 89    | <i>Referent</i>    |                   |            |       |
| Group VB                                                                                           | 3       | 1    | 4     | 1.95               | 0.576             | 0.19       | 20.2  |
| Group VC                                                                                           | 70      | 28   | 98    | 2.34               | <b>0.023</b>      | 1.12       | 4.87  |
| Rigid gas permeable                                                                                | 11      | 5    | 16    | 2.66               | 0.113             | 0.79       | 8.91  |
| Unknown                                                                                            | 22      | 3    | 25    |                    |                   |            |       |
| <b>Total</b>                                                                                       | 213     | 63   | 276   |                    |                   |            |       |
| <b>CL grouping simplified:</b>                                                                     |         |      |       |                    |                   |            |       |
| Groups I + II + III                                                                                | 18      | 6    | 24    | 1.95               | 0.233             | 0.65       | 5.83  |
| Group IV                                                                                           | 13      | 7    | 20    | 3.15               | <b>0.039</b>      | 1.06       | 9.37  |
| Group VA                                                                                           | 76      | 13   | 89    | <i>Referent</i>    |                   |            |       |
| Group VB + VC                                                                                      | 73      | 29   | 102   | 2.32               | <b>0.023</b>      | 1.12       | 4.81  |
| Rigid gas permeable CL's                                                                           | 11      | 5    | 16    | 2.66               | 0.113             | 0.79       | 8.91  |
| Unknown                                                                                            | 22      | 3    | 25    |                    |                   |            |       |
| <b>Total</b>                                                                                       | 213     | 63   | 276   |                    |                   |            |       |

Supplementary Table 4 continued, page 2

|                                                  |         |      |       | Odds               |                      | 95% CI for |       |
|--------------------------------------------------|---------|------|-------|--------------------|----------------------|------------|-------|
| Variable                                         | Control | Case | Total | Ratio <sup>1</sup> | p-value              | Odds Ratio |       |
| Hygiene Score (HS) Mean                          | 4.30    | 5.09 | 4.47  | ----               | < 0.001 <sup>4</sup> | ----       | ----  |
| <b>Hygiene Score (HS) Categories<sup>3</sup></b> |         |      |       |                    |                      |            |       |
| 1: Good-Moderate (score 1.75-5.08)               | 174     | 30   | 204   | Referent           |                      |            |       |
| 2: Poor (score 5.09-8.08)                        | 39      | 33   | 72    | 4.91               | < 0.001              | 2.68       | 8.98  |
| <b>Totals</b>                                    | 213     | 63   | 276   |                    |                      |            |       |
| <b>Hand wash before handling CLs</b>             |         |      |       |                    |                      |            |       |
| 1: No/unsure                                     | 27      | 21   | 48    | 3.71               | < 0.001              | 1.90       | 7.22  |
| 2: Yes                                           | 186     | 39   | 225   | Referent           |                      |            |       |
| Unknown                                          | 0       | 3    | 3     |                    |                      |            |       |
| <b>Total</b>                                     | 213     | 63   | 276   |                    |                      |            |       |
| <b>Shower wearing CLs</b>                        |         |      |       |                    |                      |            |       |
| 1: No                                            | 141     | 25   | 166   | Referent           |                      |            |       |
| 2: Yes                                           | 72      | 38   | 110   | 2.98               | < 0.001              | 1.67       | 5.31  |
| <b>Total</b>                                     | 213     | 63   | 276   |                    |                      |            |       |
| <b>Water activity wearing CLs</b>                |         |      |       |                    |                      |            |       |
| 1: None                                          | 114     | 20   | 134   | Referent           |                      |            |       |
| 2: in Ocean/Sea/River/Lake                       | 42      | 9    | 51    | 1.22               | 0.649                | 0.52       | 2.89  |
| 3: in Public pool                                | 46      | 23   | 69    | 2.85               | 0.003                | 1.43       | 5.68  |
| 4: in Private pool                               | 8       | 7    | 15    | 4.99               | 0.005                | 1.63       | 15.29 |
| 5: in Hot tub                                    | 3       | 1    | 4     | 1.90               | 0.586                | 0.19       | 19.19 |
| Unknown                                          | 0       | 3    | 3     |                    |                      |            |       |
| <b>Total</b>                                     | 213     | 63   | 276   |                    |                      |            |       |
| <b>Water activity: 3,4,5 combined</b>            |         |      |       |                    |                      |            |       |
| 1: Nowhere                                       | 114     | 20   | 134   | Referent           |                      |            |       |
| 2: in Ocean/Sea/River/Lake                       | 42      | 9    | 51    | 1.22               | 0.649                | 0.52       | 2.89  |
| 3: Swimming Pools/Hot tub                        | 57      | 31   | 88    | 3.10               | 0.001                | 1.63       | 5.91  |
| Unknown                                          | 0       | 3    | 3     |                    |                      |            |       |
| <b>Ethnic group</b>                              |         |      |       |                    |                      |            |       |
| 1: Asian                                         | 29      | 2    | 31    | Referent           |                      |            |       |
| 2: British Other Black                           | 16      | 1    | 17    | 0.91               | 0.938                | 0.08       | 10.79 |
| 4: White Caucasian                               | 141     | 54   | 195   | 5.55               | 0.022                | 1.28       | 24.08 |
| 6: Other                                         | 27      | 3    | 30    | 1.61               | 0.616                | 0.25       | 10.39 |
| Unknown                                          | 0       | 3    | 3     |                    |                      |            |       |
| <b>Total</b>                                     | 213     | 63   | 276   |                    |                      |            |       |



Supplementary Table 4 continued, page 3

| Variable                                                                       | Control | Case | Total | Odds            | p-value      | 95% CI for |       |
|--------------------------------------------------------------------------------|---------|------|-------|-----------------|--------------|------------|-------|
|                                                                                |         |      |       | Ratio *         |              | Odds Ratio |       |
| <b>Ethnic group: 1,2,6 combined</b>                                            |         |      |       |                 |              |            |       |
| 4: White Caucasian                                                             | 141     | 54   | 195   | <i>Referent</i> |              |            |       |
| 6: Other                                                                       | 72      | 6    | 78    | 0.22            | <b>0.001</b> | 0.09       | 0.53  |
| Unknown                                                                        | 0       | 3    | 3     |                 |              |            |       |
| <b>Total</b>                                                                   | 213     | 63   | 276   |                 |              |            |       |
| <b>Occupation<sup>5</sup></b>                                                  |         |      |       |                 |              |            |       |
| 1-3 Professional/Director/Manager/Associate Professional Technical occupations | 163     | 36   | 199   | <i>Referent</i> |              |            |       |
| 4 Administrative and secretarial occupations                                   | 16      | 6    | 22    | 1.70            | 0.302        | 0.62       | 4.64  |
| 5 Skilled trades occupations                                                   | 6       | 4    | 10    | 3.02            | 0.100        | 0.81       | 11.25 |
| 6 Caring, leisure and other service occupations                                | 8       | 4    | 12    | 2.26            | 0.201        | 0.65       | 7.93  |
| 7 Sales and customer service occupations                                       | 13      | 7    | 20    | 2.44            | 0.077        | 0.91       | 6.54  |
| 8 Process, plant and machine operatives                                        | 5       | 0    | 5     |                 |              |            |       |
| 9 Occupations requiring no training                                            | 2       | 1    | 3     | 2.26            | 0.509        | 0.20       | 25.65 |
| Unknown                                                                        | 0       | 5    | 5     |                 |              |            |       |
| <b>Occupation: categories 4-9 combined</b>                                     |         |      |       |                 |              |            |       |
| 1-3 Professional/Director/Manager/Associate Professional Technical occupations | 163     | 36   | 199   | <i>Referent</i> |              |            |       |
| 4-9 Categories 4 to 9 combined                                                 | 50      | 22   | 72    | 1.99            | <b>0.029</b> | 1.07       | 3.70  |
| Unknown                                                                        | 0       | 5    | 5     |                 |              |            |       |
| <b>Total</b>                                                                   | 213     | 63   | 276   |                 |              |            |       |
| <b>Education level</b>                                                         |         |      |       |                 |              |            |       |
| 1: up to A level                                                               | 44      | 19   | 63    | <i>Referent</i> |              |            |       |
| 4: Degree                                                                      | 96      | 28   | 124   | 0.68            | 0.260        | 0.34       | 1.34  |
| 5: Higher Education                                                            | 73      | 11   | 84    | 0.35            | <b>0.013</b> | 0.15       | 0.80  |
| Unknown                                                                        | 0       | 5    | 5     |                 |              |            |       |
| <b>Total</b>                                                                   | 213     | 63   | 276   |                 |              |            |       |

- Odds ratios (OR) are **not adjusted** for confounding effects of other variables
- PAI category 2 Includes Polyquad-1(0.001%) + ALDOX (0.0005%) AND (as used by 4 controls and 1 case) Polyquad-1 (0.0003%) + Alexidine (0.00016%)
- A mean hygiene score was derived for each patient (see legend to supplementary Table 5 for details). The mean score for each patient was then used to divide the patient sample into a simple binary classification for multivariable analysis in which the worst quartile (the quartile with the highest score) of the sample was categorized as having "Poor" hygiene and compared with the rest categorized as having "Good-Moderate" hygiene. "Good-Moderate" had mean scores 1.75 - 5.08, and "Poor" mean scores 5.09 - 8.08). Hand washing before handling CLs and showering while wearing CLs were kept as separate variables and analysed as such.
- p-value of 0.0004 from non-parametric Mann-Whitney test
- Listed by categories

## Supplementary Table 5

### Contact lens hygiene compliance assessment methodology

Contact lens hygiene compliance was assessed by patient responses to 14 multiple choice questions listed here. Note: the additional hygiene variables of hand washing before handling CLs, and showering while wearing CLs were kept as separate variables and analysed as such. Hygiene scores were calculated using the following rules. The responses to each question (or composite pair of questions) from each patient were assigned a score of 1 for full compliance, 5 for partial non-compliance, and 10 for complete non-compliance. Some of the closely related original variable pairs were combined into a single analysis variable. The objective was to maximise the difference in scores between those who completely deviated from ‘good hygiene practice’ and those who were totally compliant with ‘good hygiene practice’ (scores 10 and 1 respectively). The questions were given equal importance (no weighting). For each patient, the scores were summed across all the variables, then divided by the number of observations (number of variables with score data), to arrive at a mean score for each patient. The mean score for each patient was then used to divide the patient sample into a simple binary classification for multivariable analysis (the detailed methodology for this is described in footnote 3 supplementary table 4 and in the footnotes to Tables 1 and 2).

| Category | Hygiene question Variables                                                                                   | Score | Variable ID |
|----------|--------------------------------------------------------------------------------------------------------------|-------|-------------|
|          | <b>Q23: How often do you use disinfecting solution</b>                                                       |       | 1           |
| 1        | Always                                                                                                       | 1     |             |
| 2        | Uses extended wear disposable CLs, dispose on removal, no disinfectant (excluded from main analysis sample)* | 1     |             |
| 3        | Sometimes                                                                                                    | 10    |             |
| 4        | Never (excluded from main analysis sample)#                                                                  | 10    |             |
|          | <b>Q28: How long had the bottle of solution been open</b>                                                    |       | 2           |
| 1        | 1 to 30 days                                                                                                 | 1     |             |
| 2        | 31 to 59 days                                                                                                | 5     |             |
| 3        | 60 or more days                                                                                              | 10    |             |
|          | <b>Q29: Did you transfer your solution into another container</b>                                            |       | 3           |
|          | <b>Q30: Did you use this transferred solution the last time you rinsed or stored the lenses</b>              |       | 4           |
| 1        | Q29=No                                                                                                       | 1     |             |
| 2        | Q29=Yes, Q30=No                                                                                              | 1     |             |
| 3        | Q29=yes, Q30=Unsure                                                                                          | 5     |             |
| 4        | Q29=Yes, Q30=Yes                                                                                             | 10    |             |
|          | <b>Q31: Did you rub your lenses the last time before you STORED them</b>                                     |       | 5           |
| 1        | No                                                                                                           | 10    |             |
| 2        | Yes                                                                                                          | 1     |             |
| 99       | Unsure                                                                                                       | Blank |             |
|          | <b>Q32: Did you rinse your lenses before you STORED them</b>                                                 |       | 6(a)        |
|          | <b>Q32n If Yes, rinsed with what?</b>                                                                        |       | 6(b)        |
| 1        | Q32=No                                                                                                       | 10    |             |
| 2        | Q32=Yes, Q32n=with Water                                                                                     | 5     |             |
| 3        | Q32=Yes, Q32n=with disinfectant solution / Saline                                                            | 1     |             |
|          | <b>Q33: Did you rinse your lenses the last time before you inserted them into your eyes</b>                  |       | 7(a)        |
|          | <b>Q33n: If Yes, with what?</b>                                                                              |       | 7(b)        |
| 1        | Q33=No                                                                                                       | 10    |             |

|    |                                                                                           |       |    |
|----|-------------------------------------------------------------------------------------------|-------|----|
| 2  | Q33=Yes, Q33n= disinfectant solution / Saline                                             | 1     |    |
| 3  | Q33=Yes, Q33n= Hot water                                                                  | 5     |    |
| 4  | Q33=Yes, Q33n= Warm water / Water                                                         | 10    |    |
|    | <b>Q34: Did you rub your lenses the last time before you inserted them into your eyes</b> |       | 8  |
| 1  | No                                                                                        | 10    |    |
| 2  | Yes (all responses: "with disinfectant solution")                                         | 1     |    |
|    | <b>Q35: Did you replace all the disinfecting solution in your case</b>                    |       | 9  |
| 1  | No, topped it up                                                                          | 10    |    |
| 2  | Yes                                                                                       | 1     |    |
| 99 | Unsure                                                                                    | Blank |    |
|    | <b>Q36: After you took your contact lenses out, did you rinse your case</b>               |       | 10 |
|    | <b>Q37: What did you rinse your case with</b>                                             |       | 11 |
| 1  | No rinse                                                                                  | 10    |    |
| 2  | Yes, with Saline                                                                          | 1     |    |
| 3  | Yes, with Water                                                                           | 5     |    |
| 4  | Yes, with disinfectant solution                                                           | 1     |    |
| 99 | Unsure                                                                                    | Blank |    |
|    | <b>Q38: Did you empty your case and leave it to dry</b>                                   |       | 12 |
| 1  | No                                                                                        | 10    |    |
| 2  | Yes                                                                                       | 1     |    |
| 99 | Unsure                                                                                    | Blank |    |
|    | <b>Q39: How old was your case when the symptoms started</b>                               |       | 13 |
| 1  | One to 90 days old                                                                        | 1     |    |
| 2  | More than 90 days                                                                         | 10    |    |
|    | <b>Q57: Where did you LAST carry out contact lens insertion and removal</b>               |       | 14 |
| 1  | Bathroom                                                                                  | 1     |    |
| 2  | Kitchen                                                                                   | 5     |    |
| 3  | Bedroom                                                                                   | 5     |    |
| 4  | Other                                                                                     | 10    |    |
| 99 | Unsure                                                                                    | Blank |    |

\* The categories of lens are not reusable daily wear CL's and irrelevant to the analysis

# This category was for 7 controls using saline only

**Supplementary Table 6**

## Covariate adjustment

Confounders (covariates) adjusted for in the final regression models constructed to estimate the odds ratios for a particular risk factor with optimal adjustment for confounding.

| <b>Risk factor of 'main interest'</b> | <b>Covariates adjusted for:</b>                                                                         | <b>Final Model #</b> |
|---------------------------------------|---------------------------------------------------------------------------------------------------------|----------------------|
| <b>Lens Disinfectant (PAI)</b>        | Hygiene Score; Hand washing; Shower wearing CLs; Water Activities wearing CLs; Ethnic Group; Occupation | 1                    |
| <b>CL Materials</b>                   | As for Model-1, but excluding Rigid CL solutions                                                        | 2                    |
| <b>Hygiene Score</b>                  | As for Model-1, but excluding "Shower wearing CLs"                                                      | 3                    |
| <b>Hand washing</b>                   | As for Model-3                                                                                          | 3                    |
| <b>Shower wearing CLs</b>             | As for Model-1                                                                                          | 1                    |
| <b>Water Activities wearing CLs</b>   | As for Model-3                                                                                          | 3                    |
| <b>Ethnic Group</b>                   | As for Model-3                                                                                          | 3                    |
| <b>Occupation</b>                     | As for Model-3                                                                                          | 3                    |

**Supplementary Table 7**

Swimming whilst wearing contact lenses.

Comparison of current dataset (collected 12-12-2013 to 05-06-2017 with dataset from a similar case control study of microbial keratitis (all causes) in contact lens users for data collected at Moorfields 03-12-2003 to 02-12-2005 (Reference 14 in the Text: Dart JK, Radford CF, Minassian D, Verma S, Stapleton F. Risk factors for microbial keratitis with contemporary contact lenses: a case-control study. *Ophthalmology* 2008; **115**(10): 1647-54).

| <b>Dataset and category</b>                        | <b>Total number</b> | <b>Users swimming in contact lenses</b> |                |
|----------------------------------------------------|---------------------|-----------------------------------------|----------------|
|                                                    |                     | <b>Number</b>                           | <b>Percent</b> |
| <b>Current study 12-12-2013 to 05-06-2017</b>      |                     |                                         |                |
| <i>Acanthamoeba</i> keratitis cases                | 60                  | 40                                      | 66.67          |
| Control dataset 22-11-2016 to 05-06-2017           | 213                 | 99                                      | 46.48          |
| Cases and controls combined                        | 273                 | 139                                     | 50.92          |
|                                                    |                     |                                         |                |
| <b>Dataset from 03-12-2003 to 02-12-2005 study</b> |                     |                                         |                |
| Microbial keratitis cases                          | 366                 | 224                                     | 61.20          |
| Population controls                                | 637                 | 326                                     | 51.18          |
| Hospital controls                                  | 1921                | 1103                                    | 57.42          |
| All cases and controls combined                    | 2924                | 1653                                    | 56.53          |
